# Supplementary material for: Analysis of design criteria for biological post-treatment of ozonated wastewater treatment plant effluent
Source: Royal Society of Chemistry journal article supplement (doi:10.1039/d3ew00775h), 2024-01-01
Supplement: d3ew00775h1.pdf [file d3ew00775h1.pdf]

## Supplementary Information

### Analysis of design criteria for biological post-treatment of ozonated wastewater treatment plant effluent

Daniel Sauter <sup>a</sup>, Regina Gnirss <sup>a</sup>, Thomas Wintgens <sup>\*,b,c</sup>

<sup>a</sup> Berliner Wasserbetriebe, Neue Juedenstr. 1, 10179 Berlin, Germany.

<sup>b</sup> RWTH Aachen University, Institute of Environmental Engineering, Mies-van-der-Rohe-Str. 1, 52074 Aachen, Germany.

<sup>c</sup> School of Life Sciences, Institute for Ecopreneurship, University of Applied Sciences and Arts Northwestern Switzerland, Hofackerstrasse 40, 4132 Muttenz, Switzerland.

\* Corresponding author. E-mail address: [wintgens@isa.rwth-aachen.de](mailto:wintgens@isa.rwth-aachen.de)

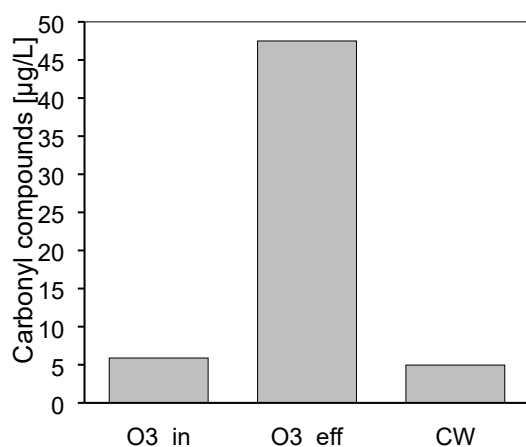

Fig. S1: Mean concentrations (n=2) of carbonyl compounds in the ozonation influent (O3\_in), ozonation effluent (O3\_eff), and the effluent of biological post-treatment with a constructed wetland (CW).

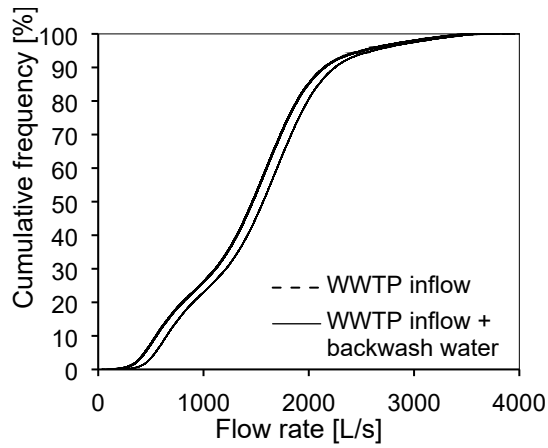

Fig. S2: Cumulative frequency of WWTP inflow data (15 min time steps) from the year 2021 with and without consideration of the backwash water.

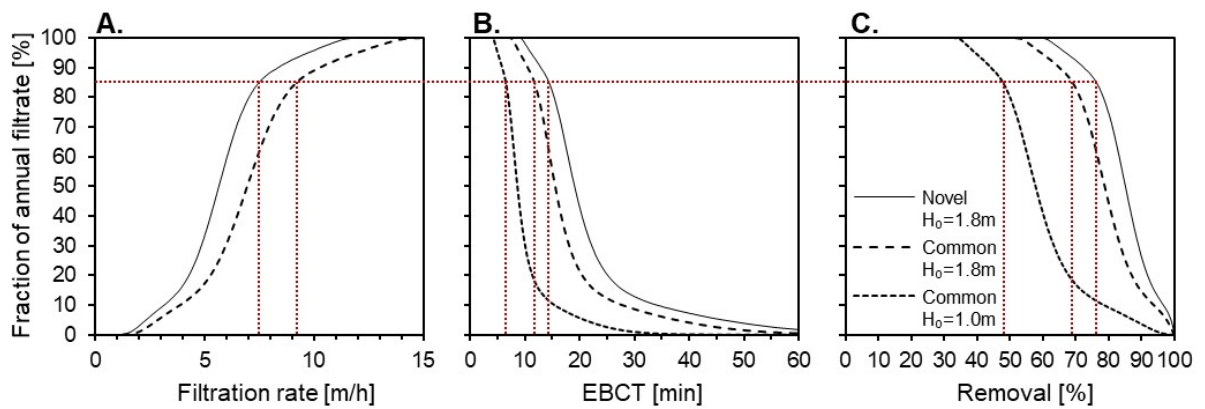

Fig. S3: Fraction of the annual filtrate as a function of the respective treatment parameters filtration rate (A.), EBCT (B.) and removal of carbonyl compounds (C.) for the novel ( $H_0 = 1.8$  m) and the common practice ( $H_0 = 1.8$  m and  $H_0 = 1$  m) dimensioning approach. Calculated based on WWTP inflow data 2021 + backwash water. Red lines mark 85<sup>th</sup> percentiles.

Table S1: Mean values (n=9) of first order kinetic constants  $k$  of the carbonyl compounds used in this study. Values are calculated from previously published results on carbonyl removal at different EBCT.<sup>1</sup>

| Compound      | $k$ [min <sup>-1</sup> ] in S/BAC filter | $k$ [min <sup>-1</sup> ] in S/A filter |
|---------------|------------------------------------------|----------------------------------------|
| Formaldehyde  | 0.11                                     | 0.10                                   |
| Acetaldehyde  | 0.09                                     | 0.07                                   |
| Propanal      | 0.14                                     | 0.14                                   |
| Butanal       | 0.10                                     | 0.09                                   |
| Glyoxal       | 0.21                                     | 0.16                                   |
| Methylglyoxal | 0.15                                     | 0.13                                   |
| Acetone       | 0.09                                     | 0.06                                   |

## References

- 1 D. Sauter, A. Dąbrowska, R. Bloch, M. Stapf, U. Miehe, A. Sperlich, R. Gnirss and T. Wintgens, Deep-bed filters as post-treatment for ozonation in tertiary municipal wastewater treatment: impact of design and operation on treatment goals, *Environ. Sci. Water Res. Technol.*, 2021, 197–211.
